# Supplementary material for: High FIB4 index is an independent risk factor of diabetic kidney disease in type 2 diabetes
Source: PubMed Central journal article supplement (PMC8175689; doi:10.1038/s41598-021-88285-6), 2021-06-03
Supplement: 41598_2021_88285_MOESM1_ESM.pdf [file 41598_2021_88285_MOESM1_ESM.pdf]

## **High FIB4 index is an independent risk factor of diabetic kidney disease in type 2 diabetes**

Haruka Saito<sup>1</sup>, Hayato Tanabe<sup>1</sup>, Akihiro Kudo<sup>1</sup>, Noritaka Machii<sup>1</sup>, Moritake Higa<sup>2</sup>, Satoshi Yamaguchi<sup>1,5</sup>, Gulinu Maimaituxun<sup>1</sup>, Kazumichi Abe<sup>3</sup>, Atsushi Takahashi<sup>3</sup>, Kenichi Tanaka<sup>4</sup>, Koichi Asahi<sup>6</sup>, Hiroaki Masuzaki<sup>7</sup>, Hiromasa Ohira<sup>3</sup>, Junichiro J. Kazama<sup>4</sup> and Michio Shimabukuro<sup>1\*</sup>

<sup>1</sup>Department of Diabetes, Endocrinology and Metabolism, <sup>3</sup>Department of Gastroenterology and <sup>4</sup>Department of Nephrology and Hypertension, Fukushima Medical University, Fukushima, Japan; <sup>2</sup>Department of Diabetes and Lifestyle-Related Disease Center, Tomishiro Central Hospital, Okinawa, Japan; <sup>5</sup>Department of Cardiology, Nakagami Hospital, Okinawa, Japan; <sup>6</sup>Division of Nephrology and Hypertension, Iwate Medical University, Iwate, Japan; <sup>7</sup>Division of Endocrinology, Diabetes and Metabolism, Hematology, Rheumatology (Second Department of Internal Medicine), University of the Ryukyus, Okinawa, Japan.

\*Corresponding author at: Department of Diabetes, Endocrinology and Metabolism, Fukushima Medical University, 1 Hikarigaoka, Fukushima City, Fukushima 960-1295, Japan; E-mail address: [mshimabukuro-ur@umin.ac.jp](mailto:mshimabukuro-ur@umin.ac.jp) (M. Shimabukuro); Tel +81-24-547-1305 , Fax +81-24-547-1311

|                                    | Univariate       | P value | Multivariate     | P value |
|------------------------------------|------------------|---------|------------------|---------|
| FIB4 > 1.3 (yes vs. no)            | 2.00 (1.45-2.76) | <0.01   | 1.72 (1.16-2.56) | <0.01   |
| Age (years)                        | 1.02 (1.01-1.04) | <0.01   | 1.01 (0.99-1.03) | 0.53    |
| Sex (male vs. female)              | 1.13 (0.84-1.52) | 0.42    | 1.06 (0.71-1.59) | 0.77    |
| BMI (kg/m <sup>2</sup> )           | 0.99 (0.97-1.02) | 0.57    | 1.00 (0.98-1.03) | 0.79    |
| eGFR (mL/min/1.73 m <sup>2</sup> ) | 0.98 (0.97-0.99) | <0.01   | 0.99 (0.98-0.99) | <0.05   |
| Median HbA1c (%)                   | 0.97 (0.81-1.17) | 0.78    | 1.06 (0.85-1.32) | 0.62    |
| Hypertension (yes vs. no)          | 1.28 (0.91-1.80) | 0.16    | 1.03 (0.69-1.55) | 0.89    |
| Dyslipidemia (yes vs. no)          | 0.96 (0.69-1.34) | 0.81    | 0.93 (0.66-1.32) | 0.68    |
| Past drinker (yes vs. no)          | 1.00 (0.74-1.34) | 0.98    | 0.90 (0.62-1.31) | 0.57    |
| Past smoker (yes vs. no)           | 1.06 (0.79-1.42) | 0.72    | 1.07 (0.74-1.54) | 0.72    |
| Sulfonylurea (yes vs. no)          | 1.22 (0.88-1.69) | 0.23    | 1.08 (0.73-1.60) | 0.71    |
| Biguanide (yes vs. no)             | 1.17 (0.78-1.75) | 0.46    | 1.13 (0.73-1.74) | 0.58    |
| Thiazolidine (yes vs. no)          | 1.33 (0.70-2.52) | 0.39    | 1.36 (0.70-2.64) | 0.36    |
| αGI (yes vs. no)                   | 0.99 (0.68-1.44) | 0.95    | 0.83 (0.54-1.25) | 0.37    |
| Insulin (yes vs. no)               | 1.68 (1.10-2.58) | <0.05   | 1.49 (0.94-2.36) | 0.09    |
| RAS inhibitor (yes vs. no)         | 1.53 (1.12-2.08) | <0.01   | 1.35 (0.95-1.91) | 0.10    |

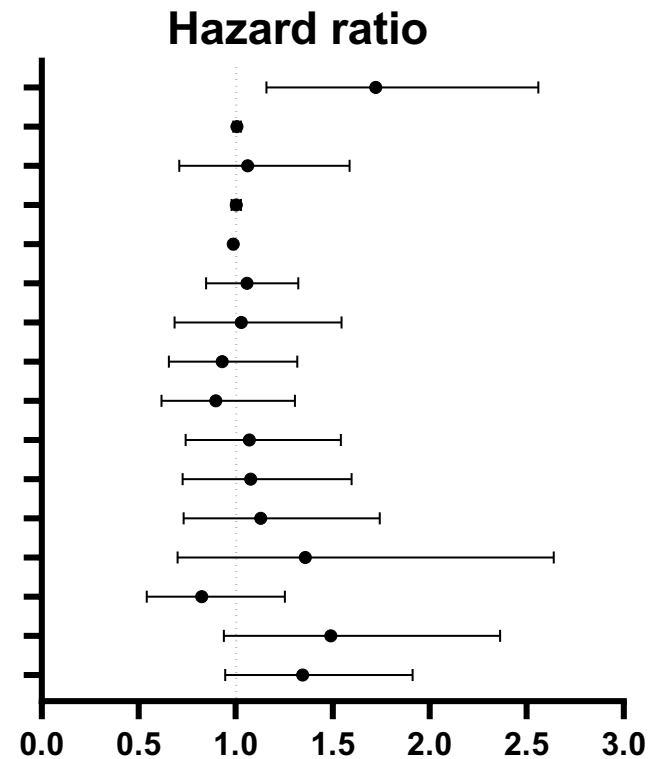

**Supplement Figure 1.** Hazard ratios for the development of diabetic kidney disease (DKD: eGFR < 60 mL/min/1.73 m<sup>2</sup> or proteinuria in type 2 diabetic patients (Cox proportional hazards model). 95% CI, 95% confidence interval. In this model, median HbA1c (%) was used in place of baseline HbA1c in **Figure 3A**.
