# Supplementary material for: High FIB4 index is an independent risk factor of diabetic kidney disease in type 2 diabetes
Source: PubMed Central journal article supplement (PMC8175689; doi:10.1038/s41598-021-88285-6), 2021-06-03
Supplement: 41598_2021_88285_MOESM2_ESM.pdf [file 41598_2021_88285_MOESM2_ESM.pdf]

## **High FIB4 index is an independent risk factor of diabetic kidney disease in type 2 diabetes**

Haruka Saito<sup>1</sup>, Hayato Tanabe<sup>1</sup>, Akihiro Kudo<sup>1</sup>, Noritaka Machii<sup>1</sup>, Moritake Higa<sup>2</sup>, Satoshi Yamaguchi<sup>1,5</sup>, Gulinu Maimaituxun<sup>1</sup>, Kazumichi Abe<sup>3</sup>, Atsushi Takahashi<sup>3</sup>, Kenichi Tanaka<sup>4</sup>, Koichi Asahi<sup>6</sup>, Hiroaki Masuzaki<sup>7</sup>, Hiromasa Ohira<sup>3</sup>, Junichiro J. Kazama<sup>4</sup> and Michio Shimabukuro<sup>1\*</sup>

<sup>1</sup>Department of Diabetes, Endocrinology and Metabolism, <sup>3</sup>Department of Gastroenterology and <sup>4</sup>Department of Nephrology and Hypertension, Fukushima Medical University, Fukushima, Japan; <sup>2</sup>Department of Diabetes and Lifestyle-Related Disease Center, Tomishiro Central Hospital, Okinawa, Japan; <sup>5</sup>Department of Cardiology, Nakagami Hospital, Okinawa, Japan; <sup>6</sup>Division of Nephrology and Hypertension, Iwate Medical University, Iwate, Japan; <sup>7</sup>Division of Endocrinology, Diabetes and Metabolism, Hematology, Rheumatology (Second Department of Internal Medicine), University of the Ryukyus, Okinawa, Japan.

\*Corresponding author at: Department of Diabetes, Endocrinology and Metabolism, Fukushima Medical University, 1 Hikarigaoka, Fukushima City, Fukushima 960-1295, Japan; E-mail address: [mshimabukuro-ur@umin.ac.jp](mailto:mshimabukuro-ur@umin.ac.jp) (M. Shimabukuro); Tel +81-24-547-1305 , Fax +81-24-547-1311

## A. DKD

|                                    | Univariate          | P value | Multivariate        | P value |
|------------------------------------|---------------------|---------|---------------------|---------|
| FIB4 Index (per 1 unit)            | 1.254 (1.115-1.410) | <0.001  | 1.285 (1.107-1.492) | 0.001   |
| Age (per year)                     | 1.019 (1.007-1.032) | 0.001   | 1.005 (0.990-1.019) | 0.522   |
| Sex (male vs. female)              | 1.196 (0.939-1.523) | 0.147   | 1.130 (0.816-1.565) | 0.460   |
| BMI (kg/m <sup>2</sup> )           | 1.001 (0.981-1.022) | 0.897   | 1.008 (0.988-1.028) | 0.433   |
| eGFR (mL/min/1.73 m <sup>2</sup> ) | 0.989 (0.981-0.997) | 0.008   | 0.988 (0.979-0.996) | 0.005   |
| HbA1c (%)                          | 1.053 (0.998-1.111) | 0.062   | 1.066 (1.004-1.133) | 0.038   |
| Hypertension (yes vs. no)          | 1.473 (1.146-1.893) | 0.002   | 1.264 (0.955-1.673) | 0.101   |
| Dyslipidemia (yes vs. no)          | 1.015 (0.779-1.322) | 0.914   | 0.941 (0.713-1.241) | 0.665   |
| Past drinker (yes vs. no)          | 1.003 (0.794-1.266) | 0.982   | 0.917 (0.680-1.239) | 0.574   |
| Past smoker (yes vs. no)           | 1.221 (0.967-1.541) | 0.094   | 1.244 (0.942-1.643) | 0.124   |
| Sulfonylurea (yes vs. no)          | 1.524 (1.150-2.020) | 0.003   | 1.411 (1.016-1.959) | 0.040   |
| Biguanide (yes vs. no)             | 1.188 (0.847-1.667) | 0.318   | 1.088 (0.759-1.558) | 0.646   |
| Thiazolidine (yes vs. no)          | 1.110 (0.621-1.981) | 0.725   | 1.005 (0.557-1.812) | 0.987   |
| αGI (yes vs. no)                   | 1.093 (0.760-1.571) | 0.633   | 0.844 (0.566-1.259) | 0.844   |
| Insulin (yes vs. no)               | 1.720 (1.130-2.616) | 0.011   | 1.470 (0.936-2.311) | 0.095   |
| RAS inhibitor (yes vs. no)         | 1.616 (1.236-2.112) | <0.001  | 1.431 (1.060-1.932) | 0.019   |

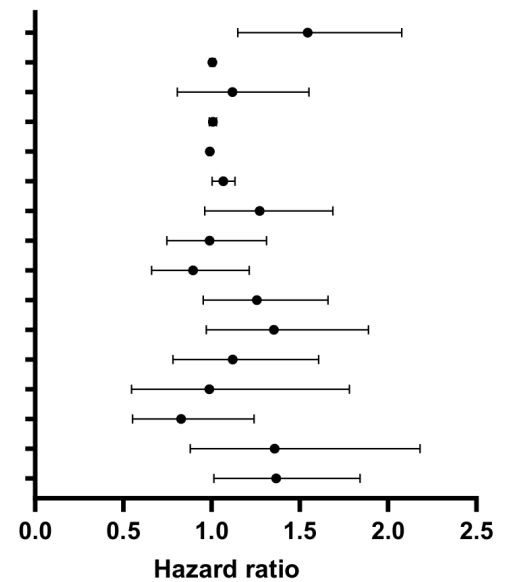

## B. eGFR < 60

|                                    | Univariate          | P value | Multivariate        | P value |
|------------------------------------|---------------------|---------|---------------------|---------|
| FIB4 Index (per 1 unit)            | 1.314 (1.142-1.511) | <0.001  | 1.220 (0.982-1.518) | 0.073   |
| Age (per year)                     | 1.055 (1.039-1.071) | <0.001  | 1.032 (1.012-1.052) | 0.002   |
| Sex (male vs. female)              | 0.809 (0.604-1.083) | 0.155   | 0.842 (0.558-1.269) | 0.411   |
| BMI (kg/m <sup>2</sup> )           | 0.999 (0.972-1.026) | 0.922   | 1.019 (0.995-1.044) | 0.122   |
| eGFR (mL/min/1.73 m <sup>2</sup> ) | 0.953 (0.940-0.965) | <0.001  | 0.957 (0.944-0.970) | <0.001  |
| HbA1c (%)                          | 1.060 (0.993-1.132) | 0.081   | 1.111 (1.030-1.198) | 0.007   |
| Hypertension (yes vs. no)          | 1.864 (1.338-2.598) | <0.001  | 1.370 (0.946-1.985) | 0.096   |
| Dyslipidemia (yes vs. no)          | 1.097 (0.784-1.536) | 0.589   | 1.104 (0.776-1.572) | 0.581   |
| Past drinker (yes vs. no)          | 0.691 (0.517-0.925) | 0.013   | 0.867 (0.590-1.274) | 0.467   |
| Past smoker (yes vs. no)           | 0.851 (0.636-1.139) | 0.278   | 1.109 (0.771-1.594) | 0.578   |
| Sulfonylurea (yes vs. no)          | 1.992 (1.433-2.769) | <0.001  | 1.522 (1.030-2.250) | 0.035   |
| Biguanide (yes vs. no)             | 1.639 (1.124-2.389) | 0.010   | 1.399 (0.930-2.103) | 0.107   |
| Thiazolidine (yes vs. no)          | 1.197 (0.588-2.435) | 0.620   | 1.049 (0.509-2.163) | 0.896   |
| αGI (yes vs. no)                   | 1.305 (0.850-2.005) | 0.224   | 0.867 (0.542-1.388) | 0.552   |
| Insulin (yes vs. no)               | 1.735 (1.052-2.860) | 0.031   | 1.235 (0.714-2.138) | 0.450   |
| RAS inhibitor (yes vs. no)         | 1.952 (1.429-2.666) | <0.001  | 1.443 (1.013-2.055) | 0.042   |

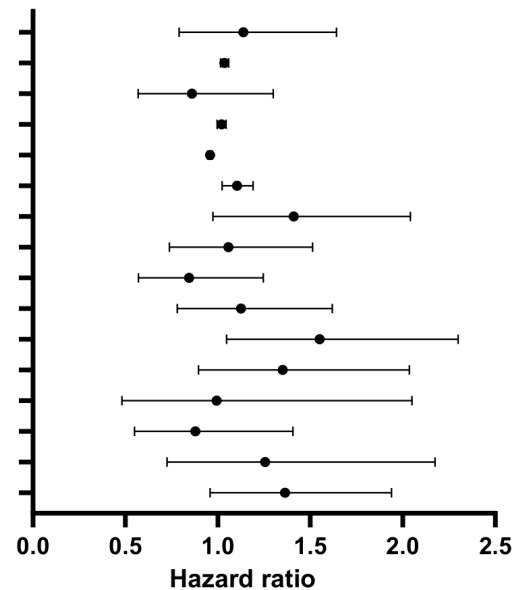

## C. Proteinuria

|                                    | Univariate          | P value | Multivariate        | P value |
|------------------------------------|---------------------|---------|---------------------|---------|
| FIB4 Index (per 1 unit)            | 1.195 (1.007-1.417) | 0.041   | 1.261 (1.051-1.513) | 0.012   |
| Age (per year)                     | 0.995 (0.980-1.010) | 0.518   | 0.992 (0.974-1.010) | 0.391   |
| Sex (male vs. female)              | 1.644 (1.191-2.267) | 0.002   | 1.316 (0.865-2.001) | 0.199   |
| BMI (kg/m <sup>2</sup> )           | 1.007 (0.982-1.033) | 0.561   | 1.008 (0.983-1.033) | 0.543   |
| eGFR (mL/min/1.73 m <sup>2</sup> ) | 1.008 (1.001-1.015) | 0.026   | 1.004 (0.996-1.013) | 0.329   |
| HbA1c (%)                          | 1.088 (1.018-1.163) | 0.013   | 1.071 (0.991-1.157) | 0.082   |
| Hypertension (yes vs. no)          | 1.392 (1.012-1.913) | 0.042   | 1.205 (0.849-1.711) | 0.296   |
| Dyslipidemia (yes vs. no)          | 0.986 (0.708-1.373) | 0.931   | 0.908 (0.641-1.286) | 0.587   |
| Past drinker (yes vs. no)          | 1.286 (0.955-1.731) | 0.098   | 0.988 (0.687-1.422) | 0.949   |
| Past smoker (yes vs. no)           | 1.739 (1.290-2.345) | <0.001  | 1.470 (1.031-2.096) | 0.033   |
| Sulfonylurea (yes vs. no)          | 1.563 (1.108-2.204) | 0.011   | 1.420 (0.955-2.111) | 0.083   |
| Biguanide (yes vs. no)             | 1.169 (0.770-1.772) | 0.464   | 1.091 (0.700-1.700) | 0.701   |
| Thiazolidine (yes vs. no)          | 1.749 (0.948-3.226) | 0.073   | 1.790 (0.958-3.346) | 0.068   |
| αGI (yes vs. no)                   | 1.089 (0.696-1.706) | 0.709   | 0.845 (0.517-1.381) | 0.501   |
| Insulin (yes vs. no)               | 1.514 (0.892-2.570) | 0.125   | 1.297 (0.732-2.295) | 0.373   |
| RAS inhibitor (yes vs. no)         | 1.567 (1.123-2.189) | 0.008   | 1.407 (0.964-2.053) | 0.077   |

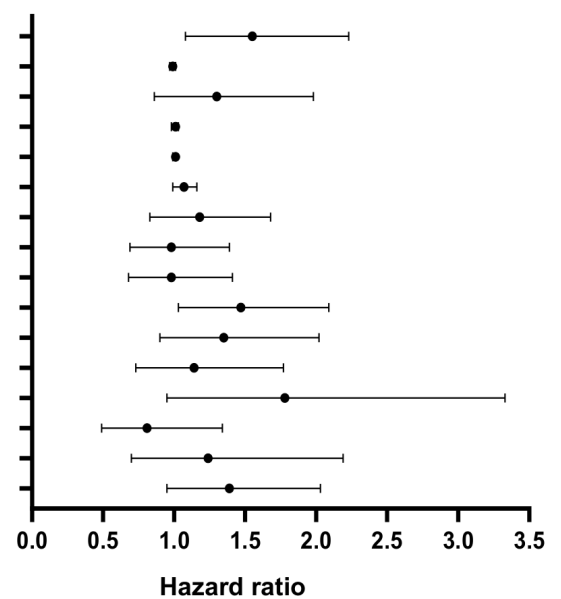

**Supplement Figure 2.** Univariate and Cox proportional hazard ratios of FIB4 index (per 1 unit) for the development of (A) diabetic kidney disease (DKD: eGFR < 60 mL/min/1.73 m<sup>2</sup> or proteinuria), (B) eGFR < 60 mL/min/1.73 m<sup>2</sup>, and (C) proteinuria in type 2 diabetic patients. Cox proportional hazard models were adjusted for age, sex, BMI, baseline HbA1c, baseline eGFR, smoking and drinking status (current or past), comorbidities (hypertension, dyslipidemia) and anti-diabetic and anti-hypertensive medications. 95% CI, 95% confidence interval.
