# Supplementary material for: High FIB4 index is an independent risk factor of diabetic kidney disease in type 2 diabetes
Source: PubMed Central journal article supplement (PMC8175689; doi:10.1038/s41598-021-88285-6), 2021-06-03
Supplement: 41598_2021_88285_MOESM3_ESM.pdf [file 41598_2021_88285_MOESM3_ESM.pdf]

## **High FIB4 index is an independent risk factor of diabetic kidney disease in type 2 diabetes**

Haruka Saito<sup>1</sup>, Hayato Tanabe<sup>1</sup>, Akihiro Kudo<sup>1</sup>, Noritaka Machii<sup>1</sup>, Moritake Higa<sup>2</sup>, Satoshi Yamaguchi<sup>1,5</sup>, Gulinu Maimaituxun<sup>1</sup>, Kazumichi Abe<sup>3</sup>, Atsushi Takahashi<sup>3</sup>, Kenichi Tanaka<sup>4</sup>, Koichi Asahi<sup>6</sup>, Hiroaki Masuzaki<sup>7</sup>, Hiromasa Ohira<sup>3</sup>, Junichiro J. Kazama<sup>4</sup> and Michio Shimabukuro<sup>1\*</sup>

<sup>1</sup>Department of Diabetes, Endocrinology and Metabolism, <sup>3</sup>Department of Gastroenterology and <sup>4</sup>Department of Nephrology and Hypertension, Fukushima Medical University, Fukushima, Japan; <sup>2</sup>Department of Diabetes and Lifestyle-Related Disease Center, Tomishiro Central Hospital, Okinawa, Japan; <sup>5</sup>Department of Cardiology, Nakagami Hospital, Okinawa, Japan; <sup>6</sup>Division of Nephrology and Hypertension, Iwate Medical University, Iwate, Japan; <sup>7</sup>Division of Endocrinology, Diabetes and Metabolism, Hematology, Rheumatology (Second Department of Internal Medicine), University of the Ryukyus, Okinawa, Japan.

\*Corresponding author at: Department of Diabetes, Endocrinology and Metabolism, Fukushima Medical University, 1 Hikarigaoka, Fukushima City, Fukushima 960-1295, Japan; E-mail address: [mshimabukuro-ur@umin.ac.jp](mailto:mshimabukuro-ur@umin.ac.jp) (M. Shimabukuro); Tel +81-24-547-1305 , Fax +81-24-547-1311

### A. DKD

|                                    | Multivariate       | P value |
|------------------------------------|--------------------|---------|
| FIB4 Quartile                      | 1.202(1.051-1.374) | 0.007   |
| Age (per year)                     | 1.003(0.988-1.018) | 0.707   |
| Sex (male vs. female)              | 1.114(0.805-1.542) | 0.514   |
| BMI (kg/m <sup>2</sup> )           | 1.008(0.989-1.028) | 0.407   |
| eGFR (mL/min/1.73 m <sup>2</sup> ) | 0.990(0.981-0.998) | 0.017   |
| HbA1c (%)                          | 1.066(1.003-1.132) | 0.039   |
| Hypertension (yes vs. no)          | 1.273(0.962-1.686) | 0.092   |
| Dyslipidemia (yes vs. no)          | 0.969(0.732-1.281) | 0.824   |
| Past drinker (yes vs. no)          | 0.905(0.67-1.224)  | 0.518   |
| Past smoker (yes vs. no)           | 1.256(0.952-1.658) | 0.107   |
| Sulfonylurea (yes vs. no)          | 1.395(1.004-1.939) | 0.047   |
| Biganide (yes vs. no)              | 1.086(0.758-1.557) | 0.653   |
| Thiazolidine (yes vs. no)          | 0.978(0.543-1.762) | 0.94    |
| αGI (yes vs. no)                   | 0.847(0.568-1.264) | 0.416   |
| Insulin (yes vs. no)               | 1.42(0.901-2.237)  | 0.13    |
| RAS Inhibitor (yes vs. no)         | 1.40(1.039-1.887)  | 0.027   |

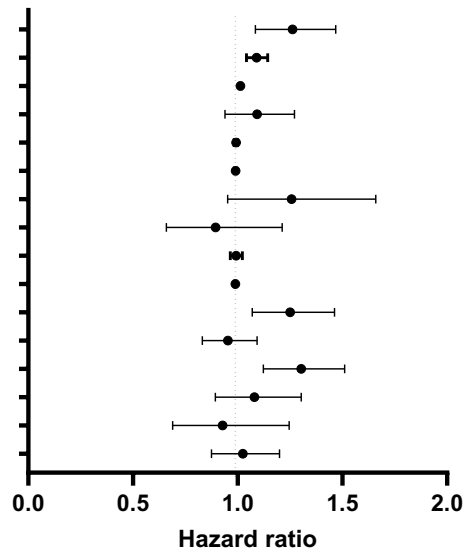

### B. eGFR < 60

|                                    | Multivariate       | P value |
|------------------------------------|--------------------|---------|
| FIB4 Quartile                      | 1.109(0.937-1.314) | 0.230   |
| Age (per year)                     | 1.033(1.012-1.054) | 0.002   |
| Sex (male vs. female)              | 0.834(0.553-1.259) | 0.388   |
| BMI (kg/m <sup>2</sup> )           | 1.019(0.996-1.044) | 0.112   |
| eGFR (mL/min/1.73 m <sup>2</sup> ) | 0.958(0.945-0.971) | <0.001  |
| HbA1c (%)                          | 1.109(1.028-1.196) | 0.007   |
| Hypertension (yes vs. no)          | 1.399(0.966-2.025) | 0.075   |
| Dyslipidemia (yes vs. no)          | 1.092(0.767-1.555) | 0.625   |
| Past drinker (yes vs. no)          | 0.859(0.583-1.267) | 0.444   |
| Past smoker (yes vs. no)           | 1.117(0.776-1.609) | 0.552   |
| Sulfonylurea (yes vs. no)          | 1.522(1.028-2.252) | 0.036   |
| Biganide (yes vs. no)              | 1.390(0.922-2.094) | 0.116   |
| Thiazolidine (yes vs. no)          | 1.013(0.492-2.086) | 0.971   |
| αGI (yes vs. no)                   | 0.845(0.528-1.352) | 0.482   |
| Insulin (yes vs. no)               | 1.233(0.71-2.142)  | 0.457   |
| RAS Inhibitor (yes vs. no)         | 1.402(0.987-1.991) | 0.059   |

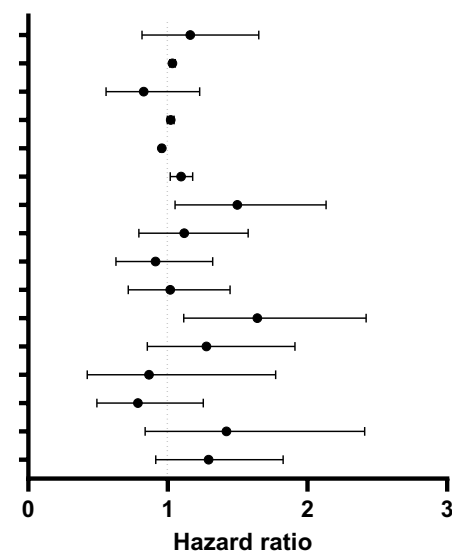

### C. Proteinuria

|                                    | Multivariate       | P value |
|------------------------------------|--------------------|---------|
| FIB4 Quartile                      | 1.246(1.058-1.469) | 0.009   |
| Age (per year)                     | 0.988(0.969-1.007) | 0.207   |
| Sex (male vs. female)              | 1.299(0.857-1.969) | 0.218   |
| BMI (kg/m <sup>2</sup> )           | 1.008(0.983-1.034) | 0.518   |
| eGFR (mL/min/1.73 m <sup>2</sup> ) | 1.005(0.997-1.014) | 0.201   |
| HbA1c (%)                          | 1.071(0.992-1.156) | 0.081   |
| Hypertension (yes vs. no)          | 1.176(0.827-1.672) | 0.366   |
| Dyslipidemia (yes vs. no)          | 0.958(0.675-1.36)  | 0.81    |
| Past drinker (yes vs. no)          | 0.971(0.674-1.397) | 0.873   |
| Past smoker (yes vs. no)           | 1.493(1.047-2.127) | 0.027   |
| Sulfonylurea (yes vs. no)          | 1.400(0.943-2.08)  | 0.095   |
| Biganide (yes vs. no)              | 1.112(0.713-1.736) | 0.639   |
| Thiazolidine (yes vs. no)          | 1.786(0.957-3.333) | 0.069   |
| αGI (yes vs. no)                   | 0.868(0.531-1.42)  | 0.573   |
| Insulin (yes vs. no)               | 1.251(0.706-2.219) | 0.443   |
| RAS Inhibitor (yes vs. no)         | 1.433(0.98-2.095)  | 0.063   |

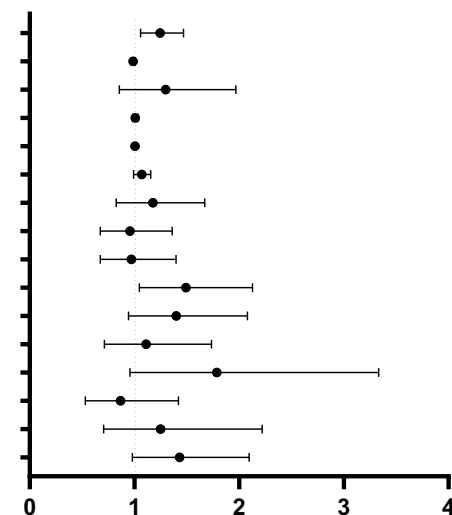

**Supplement Figure 3.** Univariate and Cox proportional hazard ratios of FIB4 quartile for the development of (A) diabetic kidney disease (DKD: eGFR < 60 mL/min/1.73 m<sup>2</sup> or proteinuria), (B) eGFR < 60 mL/min/1.73 m<sup>2</sup>, and (C) proteinuria in type 2 diabetic patients. Cox proportional hazard models were adjusted for age, sex, BMI, baseline HbA1c, baseline eGFR, smoking and drinking status (current or past), comorbidities (hypertension, dyslipidemia) and anti-diabetic and anti-hypertensive medications. 95% CI, 95% confidence interval.
