# Supplementary material for: High FIB4 index is an independent risk factor of diabetic kidney disease in type 2 diabetes
Source: PubMed Central journal article supplement (PMC8175689; doi:10.1038/s41598-021-88285-6), 2021-06-03
Supplement: 41598_2021_88285_MOESM5_ESM.pdf [file 41598_2021_88285_MOESM5_ESM.pdf]

## **High FIB4 index is an independent risk factor of diabetic kidney disease in type 2 diabetes**

Haruka Saito<sup>1</sup>, Hayato Tanabe<sup>1</sup>, Akihiro Kudo<sup>1</sup>, Noritaka Machii<sup>1</sup>, Moritake Higa<sup>2</sup>, Satoshi Yamaguchi<sup>1,5</sup>, Gulinu Maimaituxun<sup>1</sup>, Kazumichi Abe<sup>3</sup>, Atsushi Takahashi<sup>3</sup>, Kenichi Tanaka<sup>4</sup>, Koichi Asahi<sup>6</sup>, Hiroaki Masuzaki<sup>7</sup>, Hiromasa Ohira<sup>3</sup>, Junichiro J. Kazama<sup>4</sup> and Michio Shimabukuro<sup>1\*</sup>

<sup>1</sup>Department of Diabetes, Endocrinology and Metabolism, <sup>3</sup>Department of Gastroenterology and <sup>4</sup>Department of Nephrology and Hypertension, Fukushima Medical University, Fukushima, Japan; <sup>2</sup>Department of Diabetes and Lifestyle-Related Disease Center, Tomishiro Central Hospital, Okinawa, Japan; <sup>5</sup>Department of Cardiology, Nakagami Hospital, Okinawa, Japan; <sup>6</sup>Division of Nephrology and Hypertension, Iwate Medical University, Iwate, Japan; <sup>7</sup>Division of Endocrinology, Diabetes and Metabolism, Hematology, Rheumatology (Second Department of Internal Medicine), University of the Ryukyus, Okinawa, Japan.

\*Corresponding author at: Department of Diabetes, Endocrinology and Metabolism, Fukushima Medical University, 1 Hikarigaoka, Fukushima City, Fukushima 960-1295, Japan; E-mail address: [mshimabukuro-ur@umin.ac.jp](mailto:mshimabukuro-ur@umin.ac.jp) (M. Shimabukuro); Tel +81-24-547-1305 , Fax +81-24-547-1311

### A. DKD

|                                    | Multivariate       | P value |
|------------------------------------|--------------------|---------|
| FIB4 Index > 1.3 (yes vs. no)      | 1.513(1.139-2.011) | 0.006   |
| Age (per year)                     | 1.003(0.989-1.018) | 0.668   |
| Sex (male vs. female)              | 1.132(0.825-1.552) | 0.451   |
| BMI (kg/m <sup>2</sup> )           | 1.009(0.989-1.029) | 0.369   |
| eGFR (mL/min/1.73 m <sup>2</sup> ) | 0.991(0.983-0.999) | 0.036   |
| HbA1c (%)                          | 1.045(0.986-1.107) | 0.146   |
| Hypertension (yes vs. no)          | 1.323(1.014-1.726) | 0.039   |
| Dyslipidemia (yes vs. no)          | 1.009(0.773-1.319) | 0.946   |
| Past drinker (yes vs. no)          | 0.91(0.681-1.216)  | 0.537   |
| Past smoker (yes vs. no)           | 1.159(0.888-1.51)  | 0.306   |
| Sulfonylurea (yes vs. no)          | 1.437(1.037-1.991) | 0.030   |
| Biganide (yes vs. no)              | 1.027(0.72-1.464)  | 0.886   |
| Thiazolidine (yes vs. no)          | 0.805(0.459-1.412) | 0.449   |
| αGI (yes vs. no)                   | 0.78(0.524-1.163)  | 0.223   |
| Insulin (yes vs. no)               | 1.559(1.002-2.425) | 0.050   |
| RAS Inhibitor (yes vs. no)         | 1.267(0.945-1.698) | 0.115   |

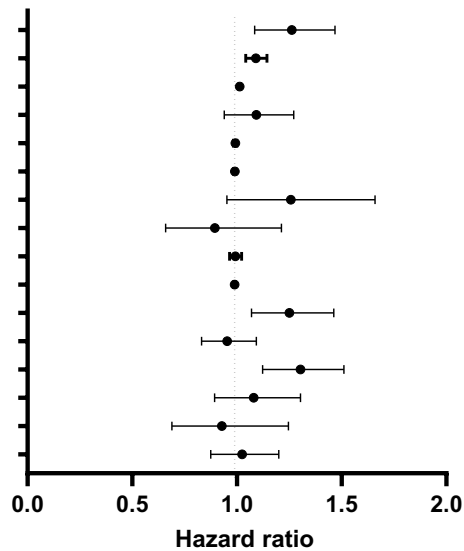

### B. eGFR < 60

|                                    | Multivariate       | P value |
|------------------------------------|--------------------|---------|
| FIB4 Index > 1.3 (yes vs. no)      | 1.16(0.815-1.652)  | 0.424   |
| Age (per year)                     | 1.033(1.014-1.053) | 0.001   |
| Sex (male vs. female)              | 0.827(0.557-1.228) | 0.353   |
| BMI (kg/m <sup>2</sup> )           | 1.02(0.996-1.045)  | 0.110   |
| eGFR (mL/min/1.73 m <sup>2</sup> ) | 0.956(0.943-0.969) | 0.000   |
| HbA1c (%)                          | 1.094(1.017-1.177) | 0.016   |
| Hypertension (yes vs. no)          | 1.498(1.051-2.134) | 0.025   |
| Dyslipidemia (yes vs. no)          | 1.118(0.793-1.575) | 0.525   |
| Past drinker (yes vs. no)          | 0.912(0.629-1.322) | 0.630   |
| Past smoker (yes vs. no)           | 1.017(0.716-1.445) | 0.826   |
| Sulfonylurea (yes vs. no)          | 1.641(1.114-2.42)  | 0.012   |
| Biganide (yes vs. no)              | 1.276(0.852-1.91)  | 0.238   |
| Thiazolidine (yes vs. no)          | 0.865(0.423-1.772) | 0.692   |
| αGI (yes vs. no)                   | 0.785(0.491-1.253) | 0.310   |
| Insulin (yes vs. no)               | 1.42(0.837-2.409)  | 0.195   |
| RAS Inhibitor (yes vs. no)         | 1.291(0.913-1.826) | 0.149   |

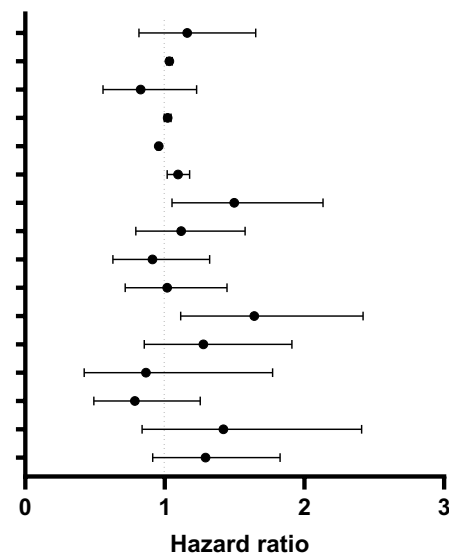

### C. Proteinuria

|                                    | Multivariate       | P value |
|------------------------------------|--------------------|---------|
| FIB4 Index > 1.3 (yes vs. no)      | 1.489(1.049-2.112) | 0.031   |
| Age (per year)                     | 0.992(0.974-1.01)  | 0.386   |
| Sex (male vs. female)              | 1.279(0.85-1.924)  | 0.238   |
| BMI (kg/m <sup>2</sup> )           | 1.011(0.986-1.036) | 0.401   |
| eGFR (mL/min/1.73 m <sup>2</sup> ) | 1.008(1.000-1.016) | 0.050   |
| HbA1c (%)                          | 1.049(0.974-1.13)  | 0.218   |
| Hypertension (yes vs. no)          | 1.213(0.868-1.697) | 0.260   |
| Dyslipidemia (yes vs. no)          | 0.993(0.709-1.391) | 0.969   |
| Past drinker (yes vs. no)          | 1.002(0.703-1.429) | 0.859   |
| Past smoker (yes vs. no)           | 1.406(1.000-1.977) | 0.053   |
| Sulfonylurea (yes vs. no)          | 1.401(0.94-2.087)  | 0.098   |
| Biganide (yes vs. no)              | 1.05(0.674-1.636)  | 0.831   |
| Thiazolidine (yes vs. no)          | 1.496(0.825-2.71)  | 0.185   |
| αGI (yes vs. no)                   | 0.844(0.517-1.377) | 0.497   |
| Insulin (yes vs. no)               | 1.34(0.763-2.353)  | 0.310   |
| RAS Inhibitor (yes vs. no)         | 1.313(0.906-1.902) | 0.152   |

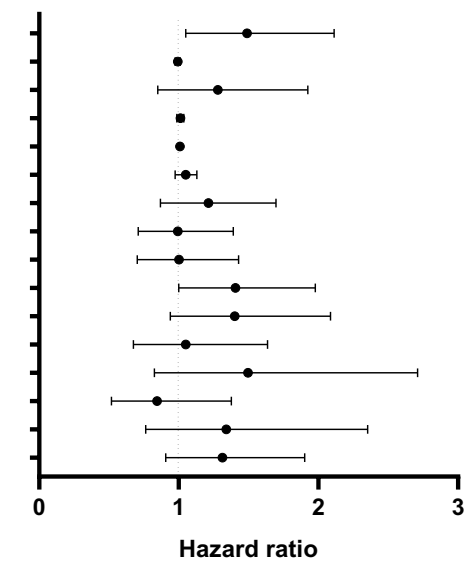

**Supplement Figure 5.** Univariate and Cox proportional hazard ratios of FIB4 index >1.30 for the development of (A) diabetic kidney disease (DKD: eGFR < 60 mL/min/1.73 m<sup>2</sup> or proteinuria), (B) eGFR < 60 mL/min/1.73 m<sup>2</sup>, and (C) proteinuria in type 2 diabetic patients of a new virtual database by multiple imputation method for missing data. Cox proportional hazard models were adjusted for age, sex, BMI, baseline HbA1c, baseline eGFR, smoking and drinking status (current or past), comorbidities (hypertension, dyslipidemia) and anti-diabetic and anti-hypertensive medications. 95% CI, 95% confidence interval. n=691
