# Supplementary material for: High FIB4 index is an independent risk factor of diabetic kidney disease in type 2 diabetes
Source: PubMed Central journal article supplement (PMC8175689; doi:10.1038/s41598-021-88285-6), 2021-06-03
Supplement: 41598_2021_88285_MOESM6_ESM.pdf [file 41598_2021_88285_MOESM6_ESM.pdf]

## **High FIB4 index is an independent risk factor of diabetic kidney disease in type 2 diabetes**

Haruka Saito<sup>1</sup>, Hayato Tanabe<sup>1</sup>, Akihiro Kudo<sup>1</sup>, Noritaka Machii<sup>1</sup>, Moritake Higa<sup>2</sup>, Satoshi Yamaguchi<sup>1,5</sup>, Gulinu Maimaituxun<sup>1</sup>, Kazumichi Abe<sup>3</sup>, Atsushi Takahashi<sup>3</sup>, Kenichi Tanaka<sup>4</sup>, Koichi Asahi<sup>6</sup>, Hiroaki Masuzaki<sup>7</sup>, Hiromasa Ohira<sup>3</sup>, Junichiro J. Kazama<sup>4</sup> and Michio Shimabukuro<sup>1\*</sup>

<sup>1</sup>Department of Diabetes, Endocrinology and Metabolism, <sup>3</sup>Department of Gastroenterology and <sup>4</sup>Department of Nephrology and Hypertension, Fukushima Medical University, Fukushima, Japan; <sup>2</sup>Department of Diabetes and Lifestyle-Related Disease Center, Tomishiro Central Hospital, Okinawa, Japan; <sup>5</sup>Department of Cardiology, Nakagami Hospital, Okinawa, Japan; <sup>6</sup>Division of Nephrology and Hypertension, Iwate Medical University, Iwate, Japan; <sup>7</sup>Division of Endocrinology, Diabetes and Metabolism, Hematology, Rheumatology (Second Department of Internal Medicine), University of the Ryukyus, Okinawa, Japan.

\*Corresponding author at: Department of Diabetes, Endocrinology and Metabolism, Fukushima Medical University, 1 Hikarigaoka, Fukushima City, Fukushima 960-1295, Japan; E-mail address: [mshimabukuro-ur@umin.ac.jp](mailto:mshimabukuro-ur@umin.ac.jp) (M. Shimabukuro); Tel +81-24-547-1305 , Fax +81-24-547-1311

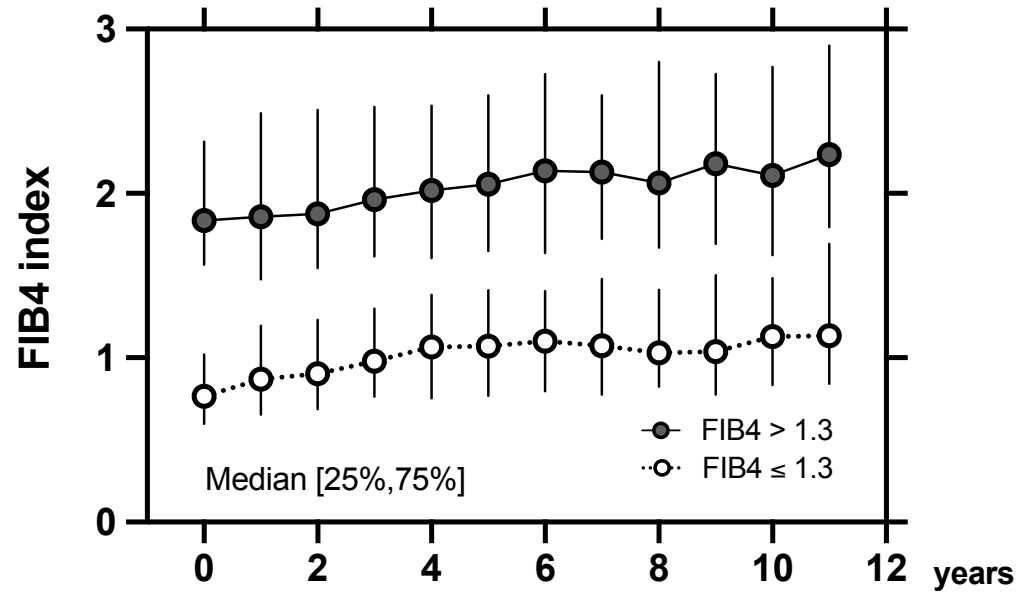

|            |        | Baseline | 1    | 2    | 3    | 4    | 5    | 6    | 7    | 8    | 9    | 10   | 11   |
|------------|--------|----------|------|------|------|------|------|------|------|------|------|------|------|
| FIB4 >1.30 | Median | 1.84     | 1.86 | 1.88 | 1.96 | 2.02 | 2.06 | 2.14 | 2.13 | 2.06 | 2.18 | 2.11 | 2.24 |
|            | 25%    | 1.57     | 1.48 | 1.55 | 1.62 | 1.61 | 1.65 | 1.64 | 1.72 | 1.67 | 1.69 | 1.62 | 1.79 |
|            | 75%    | 2.32     | 2.49 | 2.51 | 2.53 | 2.53 | 2.60 | 2.73 | 2.60 | 2.80 | 2.73 | 2.77 | 2.90 |
| FIB4 ≤1.30 | Median | 0.77     | 0.87 | 0.90 | 0.98 | 1.07 | 1.07 | 1.10 | 1.07 | 1.03 | 1.04 | 1.13 | 1.13 |
|            | 25%    | 0.60     | 0.65 | 0.69 | 0.76 | 0.75 | 0.77 | 0.80 | 0.78 | 0.82 | 0.78 | 0.83 | 0.84 |
|            | 75%    | 1.02     | 1.20 | 1.23 | 1.30 | 1.38 | 1.41 | 1.41 | 1.48 | 1.41 | 1.50 | 1.48 | 1.69 |

**Supplement Figure 6.** Annual changes in FIB4 index during the observational periods in FIB4 index >1.30 or ≤1.30. Values are median [25%, 75%].
