# Supplementary material for: High FIB4 index is an independent risk factor of diabetic kidney disease in type 2 diabetes
Source: PubMed Central journal article supplement (PMC8175689; doi:10.1038/s41598-021-88285-6), 2021-06-03
Supplement: 41598_2021_88285_MOESM7_ESM.pdf [file 41598_2021_88285_MOESM7_ESM.pdf]

High FIB4 index is an independent risk factor of diabetic kidney disease in type 2 diabetes

Haruka Saito, Hayato Tanabe, Akihiro Kudo, Noritaka Machii, Moritake Higa, Gulinu Maimaituxun, Kazumichi Abe, Atsushi Takahashi, Kenichi Tanaka, Koichi Asahi, Hiroaki Masuzaki, Hiromasa Ohira, Junichiro J. Kazama and Michio Shimabukuro

**Supplement Table.** The optimal cutoff point of FIB4 index by the highest Youden index for diabetic kidney disease (DKD)

|                                      | FIB4 index cutoff | Sensitivity | Specificity | AUC                 |
|--------------------------------------|-------------------|-------------|-------------|---------------------|
| DKD                                  | 1.296             | 0.398       | 0.740       | 0.566 (0.520-0.613) |
| eGFR < 60 mL/min/1.73 m <sup>2</sup> | 1.095             | 0.595       | 0.586       | 0.603 (0.554-0.651) |
| Proteinuria +                        | 1.197             | 0.461       | 0.638       | 0.528 (0.475-0.581) |

The optimal cutoff point of FIB4 index by the highest Youden index (EZR 1.40, Kanda Y. Investigation of the freely available easy-to-use software 'EZR' for medical statistics. Bone Marrow Transplant 2013; 48: 452-458, doi:10.1038/bmt.2012.244). Interestingly, the optimal cutoff points of FIB4 index especially for
